# Supplementary material for: Genome taxonomy of the genus Thalassotalea and proposal of Thalassotalea hakodatensis sp. nov. isolated from sea cucumber larvae
Source: PubMed Central journal article supplement (PMC10237450; doi:10.1371/journal.pone.0286693), 2023-06-02
Supplement: pone.0286693.s001.pdf [file pone.0286693.s001.pdf]

**Table S1. List of other *Colwelliaceae* genomes used for genome taxonomy of PTE2<sup>T</sup>**

| Strains                                                  | Accession       |
|----------------------------------------------------------|-----------------|
| <i>Thalassomonas actinarium</i> A5K-106 <sup>T</sup>     | GCF_000948975.1 |
| <i>Thalassomonas viridans</i> XOM25 <sup>T</sup>         | GCF_000948985.1 |
| <i>Colwellia psychrerythraea</i> 34H                     | GCF_000012325.1 |
| <i>Colwellia echini</i> A3 <sup>T</sup>                  | GCF_002843355.2 |
| <i>Colwellia piezophila</i> ATCC BAA-637 <sup>T</sup>    | GCF_000378625.1 |
| <i>Colwellia demingiae</i> ACAM 459 <sup>T</sup>         | GCF_007954275.1 |
| <i>Colwellia polaris</i> MCC 1C00015 <sup>T</sup>        | GCF_002104515.1 |
| <i>Colwellia ponticola</i> OISW-25 <sup>T</sup>          | GCF_005885605.1 |
| <i>Colwellia chukchiensis</i> CGMCC 1.9127 <sup>T</sup>  | GCF_002104455.1 |
| <i>Colwellia hornerae</i> ACAM 607 <sup>T</sup>          | GCF_007954355.1 |
| <i>Colwellia marinimaniae</i> MTCD1 <sup>T</sup>         | GCF_002207865.1 |
| <i>Litorilittus sediminis</i> JCM 17549 <sup>T</sup>     | GCF_004295665.1 |
| <i>Litorilittus lipolyticus</i> RZ04 <sup>T</sup>        | GCF_006439335.1 |
| <i>Pseudocolwellia agarivorans</i> QM50 <sup>T</sup>     | GCF_002000085.1 |
| <i>Cognaticolwellia beringensis</i> NB097-1 <sup>T</sup> | GCF_002076895.1 |
| <i>Cognaticolwellia mytili</i> KCTC 52417 <sup>T</sup>   | GCF_002104475.1 |
| <i>Cognaticolwellia aestuarii</i> CGMCC1.6965            | GCF_002104435.1 |
