# Supplementary material for: Genome taxonomy of the genus Thalassotalea and proposal of Thalassotalea hakodatensis sp. nov. isolated from sea cucumber larvae
Source: PubMed Central journal article supplement (PMC10237450; doi:10.1371/journal.pone.0286693), 2023-06-02
Supplement: pone.0286693.s002.pdf [file pone.0286693.s002.pdf]

**Table S2. *In silico* DDH and ANI values of *Thalassotalea hakodatensis* PTE2<sup>T</sup> sp. nov. against *Thalassotalea* species**

| <b>Species</b>                                          | <b><i>in silico</i> DDH</b> | <b>ANI</b> |
|---------------------------------------------------------|-----------------------------|------------|
| <i>Thalassotalea sediminis</i> KCTC 42588 <sup>T</sup>  | 20.8%                       | 77.1%      |
| <i>Thalassotalea insulae</i> KCTC 62186 <sup>T</sup>    | 20.1%                       | 72.0%      |
| <i>Thalassotalea piscium</i> JCM 18590 <sup>T</sup>     | 22.0%                       | 71.9%      |
| <i>Thalassotalea agarivorans</i> JCM 13379 <sup>T</sup> | 24.6%                       | 70.1%      |
| <i>Thalassotalea loyana</i> LMG 22536 <sup>T</sup>      | 21.8%                       | 70.5%      |
| <i>Thalassotalea eurytherma</i> JCM 18482 <sup>T</sup>  | 21.6%                       | 70.6%      |
| <i>Thalassotalea atypica</i> JCM 31894 <sup>T</sup>     | 23.1%                       | 70.7%      |
| <i>Thalassotalea marina</i> QBLM2 <sup>T</sup>          | 19.7%                       | 72.5%      |
| <i>Thalassotalea profundus</i> YM155 <sup>T</sup>       | 20.4%                       | 71.7%      |
| <i>Thalassotalea mangrovi</i> zs-4 <sup>T</sup>         | 23.4%                       | 68.5%      |
| <i>Thalassotalea crassostreae</i> LPB0090 <sup>T</sup>  | 24.3%                       | 69.6%      |
| <i>Thalassotalea algicola</i> M1531 <sup>T</sup>        | 21.0%                       | 70.9%      |
| <i>Thalassotalea litorea</i> MCCC IK03283               | 24.7%                       | 68.9%      |
| <i>Thalassotalea euphylliae</i> H2                      | 22.8%                       | 70.9%      |
