# Supplementary material for: Genome taxonomy of the genus Thalassotalea and proposal of Thalassotalea hakodatensis sp. nov. isolated from sea cucumber larvae
Source: PubMed Central journal article supplement (PMC10237450; doi:10.1371/journal.pone.0286693), 2023-06-02
Supplement: pone.0286693.s003.pdf [file pone.0286693.s003.pdf]

**Table S3. Fatty acid, isoprenoid quinone and polar lipid profile of previously reported *Thalassotalea***

|                                | 1    | 2    | 3    | 4    | 5    | 6    | 7    | 8    | 9    | 10   | 11   | 12    | 13   | 14   |
|--------------------------------|------|------|------|------|------|------|------|------|------|------|------|-------|------|------|
| <b>Predominant FA</b>          |      |      |      |      |      |      |      |      |      |      |      |       |      |      |
| C9:0                           | TR   | TR   | TR   | 1.4  | TR   | TR   | -    | -    | -    | TR   | -    | -     | -    | -    |
| C10:0                          | 2.3  | 2.6  | 1.8  | 4.9  | 1.4  | 1.1  | TR   | TR   | TR   | -    | -    | -     | 1.3  | -    |
| C11:0                          | TR   | TR   | TR   | TR   | TR   | 2.2  | TR   | -    | 1.6  | TR   | -    | -     | -    | -    |
| C12:0                          | -    | TR   | TR   | TR   | TR   | 4.8  | 2.2  | 1.7  | -    | -    | -    | -     | 2.9  | 2.1  |
| C13:0                          | -    | -    | TR   | TR   | -    | 7.3  | 1.6  | TR   | 4.7  | 4.7  | -    | -     | TR   | -    |
| C14:0                          | 6.9  | 7.1  | 2.2  | 3.7  | TR   | 4.7  | 9.9  | 5.1  | 5.9  | 4.5  | 13   | -     | 2.6  | 1.7  |
| C15:0                          | -    | -    | -    | -    | -    | -    | 5.7  | -    | -    | -    | -    | -     | -    | -    |
| C16:0                          | 10.8 | 16.8 | 19.5 | 7.8  | 5.2  | 17.5 | 9.4  | 18.5 | 15   | 22.7 | 5    | -     | 17.9 | 15.3 |
| C17:0                          | 2.6  | TR   | 3    | 1.8  | 1.9  | 11.1 | 1    | 1.2  | 3.6  | 5.5  | -    | -     | 1.9  | 4.1  |
| C18:0                          | -    | -    | -    | -    | -    | -    | -    | -    | -    | -    | -    | -     | -    | 4.3  |
| <b>Branched:</b>               |      |      |      |      |      |      |      |      |      |      |      |       |      |      |
| iso-C14:0                      | 1    | 1.3  | TR   | 2.5  | 1.8  | 4.7  | -    | -    | 2.4  | -    | -    | -     | TR   | -    |
| iso-C16:0                      | 2.1  | 5.4  | 3.4  | 7.2  | 14.6 | TR   | -    | TR   | 2.4  | 0.7  | -    | -     | 1    | -    |
| <b>Unsaturated:</b>            |      |      |      |      |      |      |      |      |      |      |      |       |      |      |
| C15:1 ω8c                      | 6.8  | 3.2  | 4.1  | 2.8  | 4.9  | 2.7  | 4.8  | 4.9  | 7.3  | -    | -    | -     | 1.5  | 5.4  |
| C16:1 ω9c                      | 3.6  | 5.1  | 10.1 | 2.7  | 3.5  | -    | 4.5  | 4.9  | 5.7  | -    | 5.7  | -     | 11.5 | 1.8  |
| iso-C17:1 ω5c                  | -    | -    | -    | -    | -    | -    | 0.3  | 9.5  | -    | -    | -    | -     | -    | -    |
| C17:1 ω8c                      | 20   | 7.4  | 9    | 20.6 | 25.1 | 12.8 | 14.9 | 9.5  | 24.2 | 15.4 | 12   | -     | 8.8  | 12.5 |
| C18:1 ω7c                      | 1.7  | 2.9  | 2    | 2.6  | 1.7  | 4.8  | 3.4  | 3.3  | -    | -    | -    | -     | 9.1  | 15.7 |
| <b>Hydroxy:</b>                |      |      |      |      |      |      |      |      |      |      |      |       |      |      |
| C10:0 3-OH                     |      |      |      |      |      |      |      |      |      |      |      |       |      | 1.4  |
| C11:0 3-OH                     | 3.5  | 1.6  | 1.1  | 5.4  | 2.5  | 1.4  | 3.7  | 2.1  | 2.2  | -    | -    | -     | 1.6  | 2.6  |
| C12:0 3-OH                     | 2.9  | 3.3  | 3.8  | 5.4  | 1.4  | 2.2  | -    | 3.9  | 1.1  | 0.4  | -    | -     | 10.2 | 3.8  |
| iso-C12:0 3-OH                 | 2.1  | 3    | 3    | -    | 6    | -    | -    | -    | TR   | -    | -    | -     | 1.8  | -    |
| <b>Summed features:</b>        |      |      |      |      |      |      |      |      |      |      |      |       |      |      |
| 3 (C16:1 ω7c and/or C16:1 ω6c) | 15.6 | 32.7 | 23.4 | 13.3 | 16.3 | 8.6  | 25.1 | 36   | 9.1  | 17.3 | 31.3 | major | 16.9 | 25.5 |
| 8 (C18:1 ω7c and/or C18:1 ω6c) | -    | -    | -    | -    | -    | -    | -    | -    | -    | 4.6  | -    | major | 4.8  | -    |
| <b>Major lipid class</b>       |      |      |      |      |      |      |      |      |      |      |      |       |      |      |
| PG                             | +    | +    | +    | +    | +    | nd   | nd   | +    | +    | +    | nd   | +     | +    | +    |
| PE                             | +    | +    | +    | +    | +    | nd   | nd   | +    | +    | +    | nd   | +     | +    | +    |
| <b>Isoprenoid quinones</b>     | Q-8  | Q-8  | Q-8  | Q-8  | Q-8  | nd   | Q-8  | Q-8  | Q-8  | Q-8  | nd   | Q-8   | Q-8  | Q-8  |
| <b>References</b>              | [8]  | [16] | [1]  | [7]  | [13] | [4]  | [19] | [15] | [17] | [11] | [3]  | [18]  | [12] | [9]  |

Strains: 1, *T. sediminis* KCTC 42588<sup>T</sup>, 2, *T. insulae* KCTC 42588<sup>T</sup>, 3, *T. piscium* JCM 18590<sup>T</sup>, 4, *T. marina* KCTC 42731<sup>T</sup>, 5, *T. profundus* YM155<sup>T</sup>, 6, *T. agarivorans* JCM 13379<sup>T</sup>, 7, *T. eurytherma* JCM 18482<sup>T</sup>, 8, *T. atypica* JCM 31894<sup>T</sup>, 9, *T. mangrovi* zs-4<sup>T</sup>, 10, *T. crassostreae* LPB 0090<sup>T</sup>, 11, *T. loyana* LMG 22536<sup>T</sup>, 12, *T. algicola* M1531<sup>T</sup>, 13, *T. litorea* HMF4135<sup>T</sup>, 14, *T. euphylliae* Eup-16<sup>T</sup>.
