# Supplementary material for: Genome taxonomy of the genus Thalassotalea and proposal of Thalassotalea hakodatensis sp. nov. isolated from sea cucumber larvae
Source: PubMed Central journal article supplement (PMC10237450; doi:10.1371/journal.pone.0286693), 2023-06-02
Supplement: pone.0286693.s004.pdf [file pone.0286693.s004.pdf]

**Table S4. FAS associated genes composition of 15 species**

| Gene names   | <i>T. hakodatensis</i><br>sp. nov. PTE2 <sup>T</sup> | <i>T. sediminis</i> | <i>T. insulae</i> | <i>T. piscium</i> | <i>T. marina</i> | <i>T. profundus</i> | <i>T. agarivorans</i> | <i>T. eurytherma</i> | <i>T. atypica</i> | <i>T. mangrovi</i> | <i>T. crassostreae</i> | <i>T. loyana</i> | <i>T. algicola</i> | <i>T. litorea</i> | <i>T. euphylliae</i> |
|--------------|------------------------------------------------------|---------------------|-------------------|-------------------|------------------|---------------------|-----------------------|----------------------|-------------------|--------------------|------------------------|------------------|--------------------|-------------------|----------------------|
| <i>accA</i>  | +                                                    | +                   | +                 | +                 | +                | +                   | +                     | +                    | +                 | +                  | +                      | +                | +                  | +                 | +                    |
| <i>accB</i>  | +                                                    | +                   | +                 | +                 | +                | +                   | +                     | +                    | +                 | +                  | +                      | +                | +                  | +                 | +                    |
| <i>accC</i>  | +                                                    | +                   | +                 | +                 | +                | +                   | +                     | +                    | +                 | +                  | +                      | +                | +                  | +                 | +                    |
| <i>accD</i>  | +                                                    | +                   | +                 | +                 | +                | +                   | +                     | +                    | +                 | +                  | +                      | +                | +                  | +                 | +                    |
| <i>fabD</i>  | +                                                    | +                   | +                 | +                 | +                | +                   | +                     | +                    | +                 | +                  | +                      | +                | +                  | +                 | +                    |
| <i>fabH</i>  | +                                                    | +                   | +                 | +                 | +                | +                   | +                     | +                    | +                 | +                  | +                      | +                | +                  | +                 | +                    |
| <i>fabY</i>  | +                                                    | +                   | +                 | +                 | +                | +                   | +                     | -                    | -                 | -                  | -                      | -                | -                  | -                 | -                    |
| <i>fabB</i>  | +                                                    | +                   | +                 | +                 | +                | +                   | +                     | +                    | +                 | +                  | +                      | +                | +                  | +                 | +                    |
| <i>fabF</i>  | +                                                    | +                   | +                 | +                 | +                | +                   | +                     | +                    | +                 | +                  | +                      | +                | +                  | +                 | +                    |
| <i>fabG</i>  | +                                                    | +                   | +                 | +                 | +                | +                   | +                     | +                    | +                 | +                  | +                      | +                | +                  | +                 | +                    |
| <i>fabA</i>  | +                                                    | +                   | +                 | +                 | +                | +                   | +                     | +                    | +                 | +                  | +                      | +                | +                  | +                 | +                    |
| <i>fabZ</i>  | +                                                    | +                   | +                 | +                 | +                | +                   | +                     | +                    | +                 | +                  | +                      | +                | +                  | +                 | +                    |
| <i>fabV</i>  | +                                                    | +                   | +                 | +                 | +                | +                   | +                     | +                    | +                 | +                  | +                      | +                | +                  | +                 | +                    |
| <i>lpxA</i>  | +                                                    | +                   | +                 | +                 | +                | +                   | +                     | +                    | +                 | +                  | +                      | +                | +                  | +                 | +                    |
| <i>lpxD</i>  | +                                                    | +                   | +                 | +                 | +                | +                   | +                     | +                    | +                 | +                  | +                      | +                | +                  | +                 | +                    |
| <i>ilvE</i>  | +                                                    | +                   | +                 | +                 | +                | +                   | +                     | +                    | +                 | +                  | +                      | +                | +                  | +                 | +                    |
| <i>dkdA1</i> | +                                                    | +                   | +                 | +                 | +                | +                   | +                     | +                    | +                 | +                  | +                      | +                | +                  | +                 | +                    |
| <i>dkdA2</i> | +                                                    | +                   | +                 | +                 | +                | +                   | +                     | +                    | +                 | +                  | +                      | +                | +                  | +                 | +                    |
| <i>dkdB</i>  | +                                                    | +                   | +                 | +                 | +                | +                   | +                     | +                    | +                 | +                  | +                      | +                | +                  | +                 | +                    |
| <i>Des1</i>  | +                                                    | +                   | +                 | +                 | +                | +                   | +                     | +                    | +                 | +                  | +                      | +                | +                  | +                 | +                    |
| <i>fadB</i>  | +                                                    | +                   | +                 | +                 | +                | +                   | +                     | +                    | +                 | +                  | +                      | +                | +                  | +                 | +                    |
| <i>fadJ</i>  | +                                                    | +                   | +                 | +                 | +                | +                   | +                     | +                    | +                 | +                  | +                      | +                | +                  | +                 | +                    |
| <i>acul</i>  | +                                                    | +                   | +                 | +                 | +                | +                   | -                     | -                    | -                 | -                  | +                      | +                | +                  | -                 | +                    |
