# Supplementary material for: Genome taxonomy of the genus Thalassotalea and proposal of Thalassotalea hakodatensis sp. nov. isolated from sea cucumber larvae
Source: PubMed Central journal article supplement (PMC10237450; doi:10.1371/journal.pone.0286693), 2023-06-02
Supplement: pone.0286693.s005.pdf [file pone.0286693.s005.pdf]

**Table S5. Results of 3D-structure prediction of Des1 by Phyre2**

| Species                                                      | PDB Molecule            | Template | Confidence | Coverage | Identity |
|--------------------------------------------------------------|-------------------------|----------|------------|----------|----------|
| <i>Thalassotalea hakodatensis</i> sp. nov. PTE2 <sup>T</sup> | Stearoyl-CoA desaturase | c4zyoA   | 100.0%     | 72%      | 30%      |
| <i>Thalassotalea sediminis</i> KCTC 42588 <sup>T</sup>       | Stearoyl-CoA desaturase | c4ymkA   | 100.0%     | 76%      | 30%      |
| <i>Thalassotalea insulae</i> KCTC 62186 <sup>T</sup>         | Stearoyl-CoA desaturase | c4ymkA   | 100.0%     | 76%      | 30%      |
| <i>Thalassotalea piscium</i> JCM 18590 <sup>T</sup>          | Stearoyl-CoA desaturase | c4ymkA   | 100.0%     | 76%      | 30%      |
| <i>Thalassotalea agarivorans</i> JCM 13379 <sup>T</sup>      | Stearoyl-CoA desaturase | c4ymkA   | 100.0%     | 75%      | 30%      |
| <i>Thalassotalea loyana</i> LMG 22536 <sup>T</sup>           | Stearoyl-CoA desaturase | c4ymkA   | 100.0%     | 76%      | 27%      |
| <i>Thalassotalea eurytherma</i> JCM 18482 <sup>T</sup>       | Stearoyl-CoA desaturase | c4ymkA   | 100.0%     | 75%      | 27%      |
| <i>Thalassotalea atypica</i> JCM 31894 <sup>T</sup>          | Stearoyl-CoA desaturase | c4ymkA   | 100.0%     | 76%      | 29%      |
| <i>Thalassotalea marina</i> QBLM2 <sup>T</sup>               | Stearoyl-CoA desaturase | c4ymkA   | 100.0%     | 77%      | 29%      |
| <i>Thalassotalea profundis</i> YM155 <sup>T</sup>            | Stearoyl-CoA desaturase | c4ymkA   | 100.0%     | 76%      | 31%      |
| <i>Thalassotalea mangrovi</i> zs-4 <sup>T</sup>              | Stearoyl-CoA desaturase | c4ymkA   | 100.0%     | 80%      | 30%      |
| <i>Thalassotalea crassostreae</i> LPB0090 <sup>T</sup>       | Stearoyl-CoA desaturase | c4ymkA   | 100.0%     | 74%      | 32%      |
| <i>Thalassotalea algicola</i> M1531 <sup>T</sup>             | Stearoyl-CoA desaturase | c4ymkA   | 100.0%     | 76%      | 30%      |
| <i>Thalassotalea litorea</i> MCCC IK03283                    | Stearoyl-CoA desaturase | c4zyoA   | 100.0%     | 75%      | 30%      |
| <i>Thalassotalea euphylliae</i> H2                           | Stearoyl-CoA desaturase | c4ymkA   | 100.0%     | 76%      | 28%      |
