# Supplementary material for: Genome taxonomy of the genus Thalassotalea and proposal of Thalassotalea hakodatensis sp. nov. isolated from sea cucumber larvae
Source: PubMed Central journal article supplement (PMC10237450; doi:10.1371/journal.pone.0286693), 2023-06-02
Supplement: pone.0286693.s006.pdf [file pone.0286693.s006.pdf]

**Table S6. PG, PE and DPG associated genes composition of each strain**

| Gene names    | <i>T. hakodatensis</i><br>sp. nov. PTE2 <sup>T</sup> | <i>T. sediminis</i> | <i>T. insulae</i> | <i>T. piscium</i> | <i>T. marina</i> | <i>T. profundus</i> | <i>T. agarivorans</i> | <i>T. eurytherma</i> | <i>T. atypica</i> | <i>T. mangrovi</i> | <i>T. crassostreae</i> | <i>T. loyana</i> | <i>T. algicola</i> | <i>T. litorea</i> | <i>T. euphylliae</i> |
|---------------|------------------------------------------------------|---------------------|-------------------|-------------------|------------------|---------------------|-----------------------|----------------------|-------------------|--------------------|------------------------|------------------|--------------------|-------------------|----------------------|
| <i>plsX</i>   | +                                                    | +                   | +                 | +                 | +                | +                   | +                     | +                    | +                 | +                  | +                      | +                | +                  | +                 | +                    |
| <i>plsY</i>   | +                                                    | +                   | +                 | +                 | +                | +                   | +                     | +                    | +                 | +                  | +                      | +                | +                  | +                 | +                    |
| <i>plsC</i>   | +                                                    | +                   | +                 | +                 | +                | +                   | +                     | +                    | +                 | +                  | +                      | +                | +                  | +                 | +                    |
| <i>cdsA</i>   | +                                                    | +                   | +                 | +                 | +                | +                   | +                     | +                    | +                 | +                  | +                      | +                | +                  | +                 | +                    |
| <i>pssA</i>   | +                                                    | +                   | +                 | +                 | +                | +                   | +                     | +                    | +                 | +                  | +                      | +                | +                  | +                 | +                    |
| <i>psd</i>    | +                                                    | +                   | +                 | +                 | +                | +                   | +                     | +                    | +                 | +                  | +                      | +                | +                  | +                 | +                    |
| <i>pgsA</i>   | +                                                    | +                   | +                 | +                 | +                | +                   | +                     | +                    | +                 | +                  | +                      | +                | +                  | +                 | +                    |
| <i>pgpA</i>   | +                                                    | +                   | +                 | +                 | +                | +                   | +                     | +                    | +                 | +                  | +                      | +                | +                  | +                 | +                    |
| <i>clsA/B</i> | -                                                    | -                   | -                 | -                 | -                | -                   | -                     | -                    | -                 | +                  | -                      | -                | -                  | +                 | -                    |
| <i>clsC</i>   | -                                                    | -                   | -                 | +                 | -                | -                   | +                     | -                    | -                 | -                  | +                      | -                | -                  | +                 | -                    |
