# Supplementary material for: Genome taxonomy of the genus Thalassotalea and proposal of Thalassotalea hakodatensis sp. nov. isolated from sea cucumber larvae
Source: PubMed Central journal article supplement (PMC10237450; doi:10.1371/journal.pone.0286693), 2023-06-02
Supplement: pone.0286693.s007.pdf [file pone.0286693.s007.pdf]

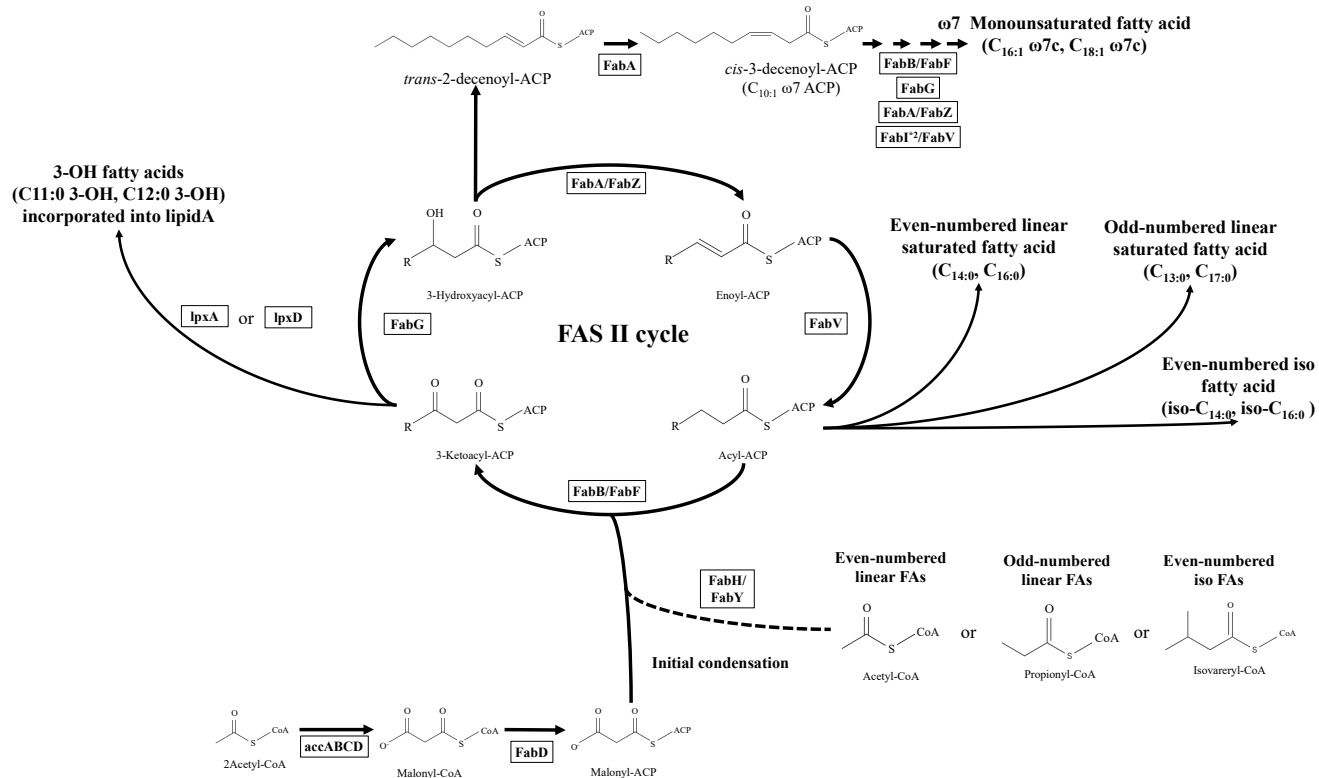

**Fig S1. Predicted fatty acid synthetic pathway in *Thalassotalea* species.**

ACP: acyl-carrier protein; AccABCD: acetyl-CoA carboxylase complex; FabD: malonyl-CoA: ACP transacylase; FabH/FabY: 3-ketoacyl-ACP synthase III; FabB: 3-ketoacyl-ACP synthase I; FabF: 3-ketoacyl-ACP synthase II; FabG: 3-ketoacyl-ACP reductase; FabA: 3-hydroxyacyl-ACP dehydratase/*trans*-2-decenoyl-ACP isomerase; FabV: enoyl-ACP reductase; FabZ: 3-hydroxyacyl-ACP dehydratase.
