# Supplementary material for: Genome taxonomy of the genus Thalassotalea and proposal of Thalassotalea hakodatensis sp. nov. isolated from sea cucumber larvae
Source: PubMed Central journal article supplement (PMC10237450; doi:10.1371/journal.pone.0286693), 2023-06-02
Supplement: pone.0286693.s008.pdf [file pone.0286693.s008.pdf]

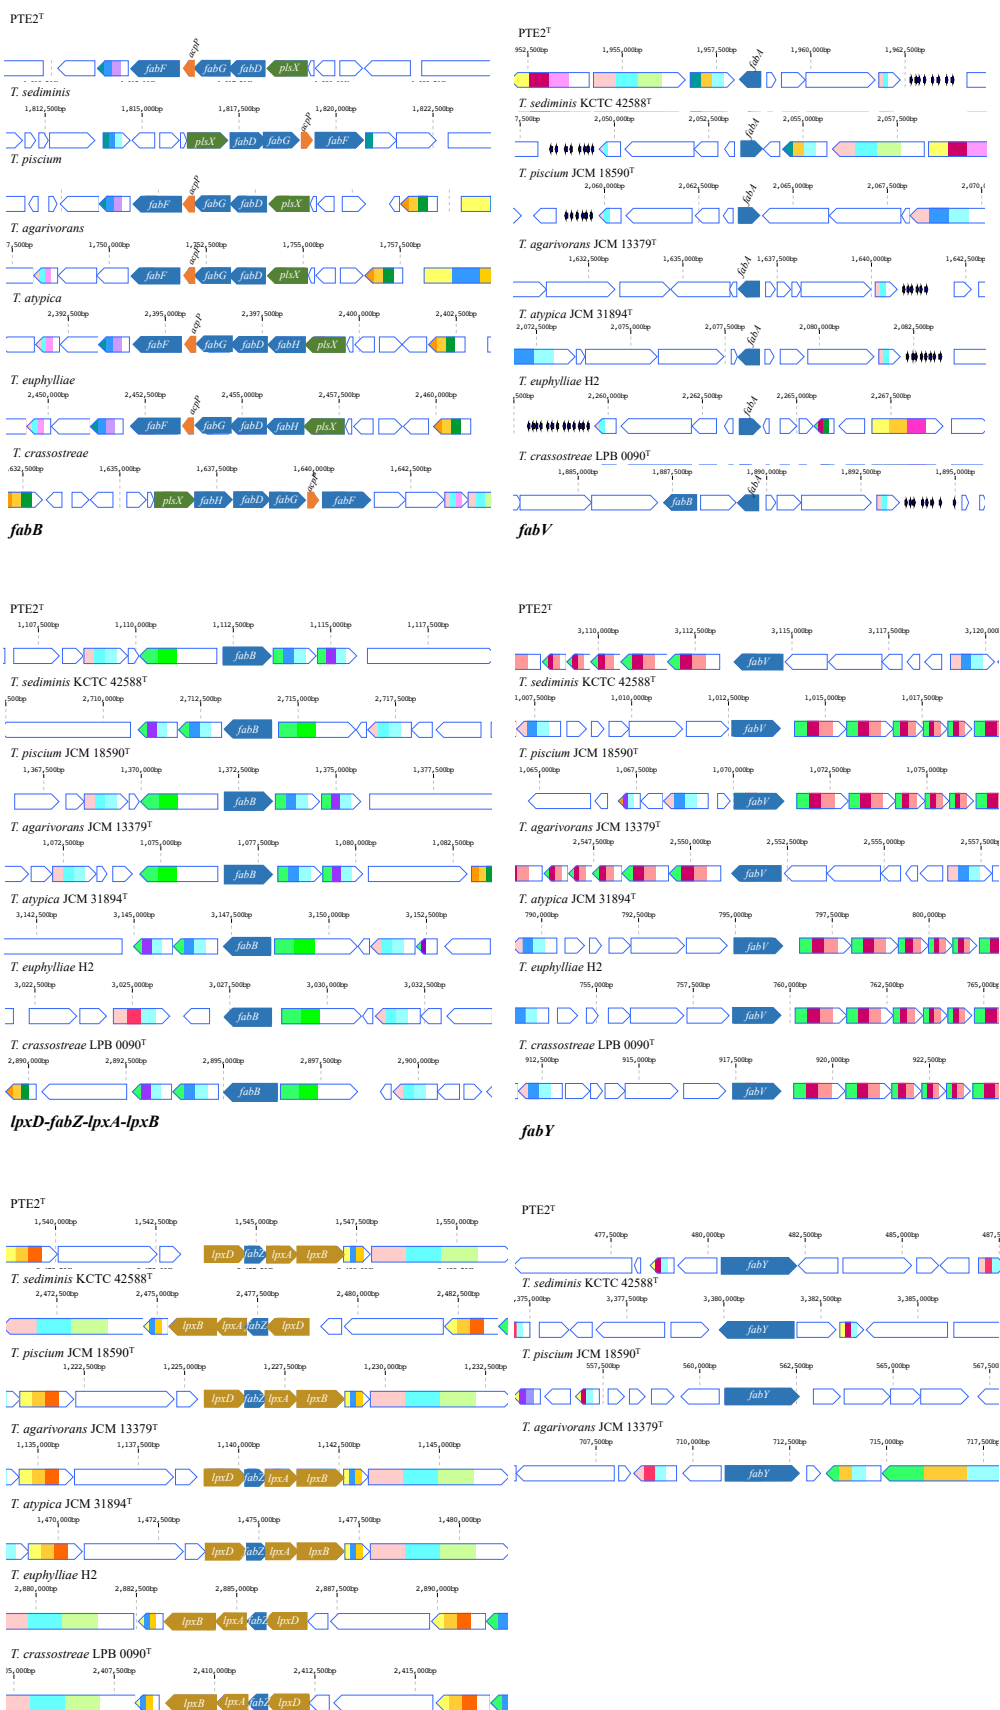

**Fig S2. Genomic structure of *Thalassotalea fab* and associated genes.**
