# Supplementary material for: Genome taxonomy of the genus Thalassotalea and proposal of Thalassotalea hakodatensis sp. nov. isolated from sea cucumber larvae
Source: PubMed Central journal article supplement (PMC10237450; doi:10.1371/journal.pone.0286693), 2023-06-02
Supplement: pone.0286693.s009.pdf [file pone.0286693.s009.pdf]

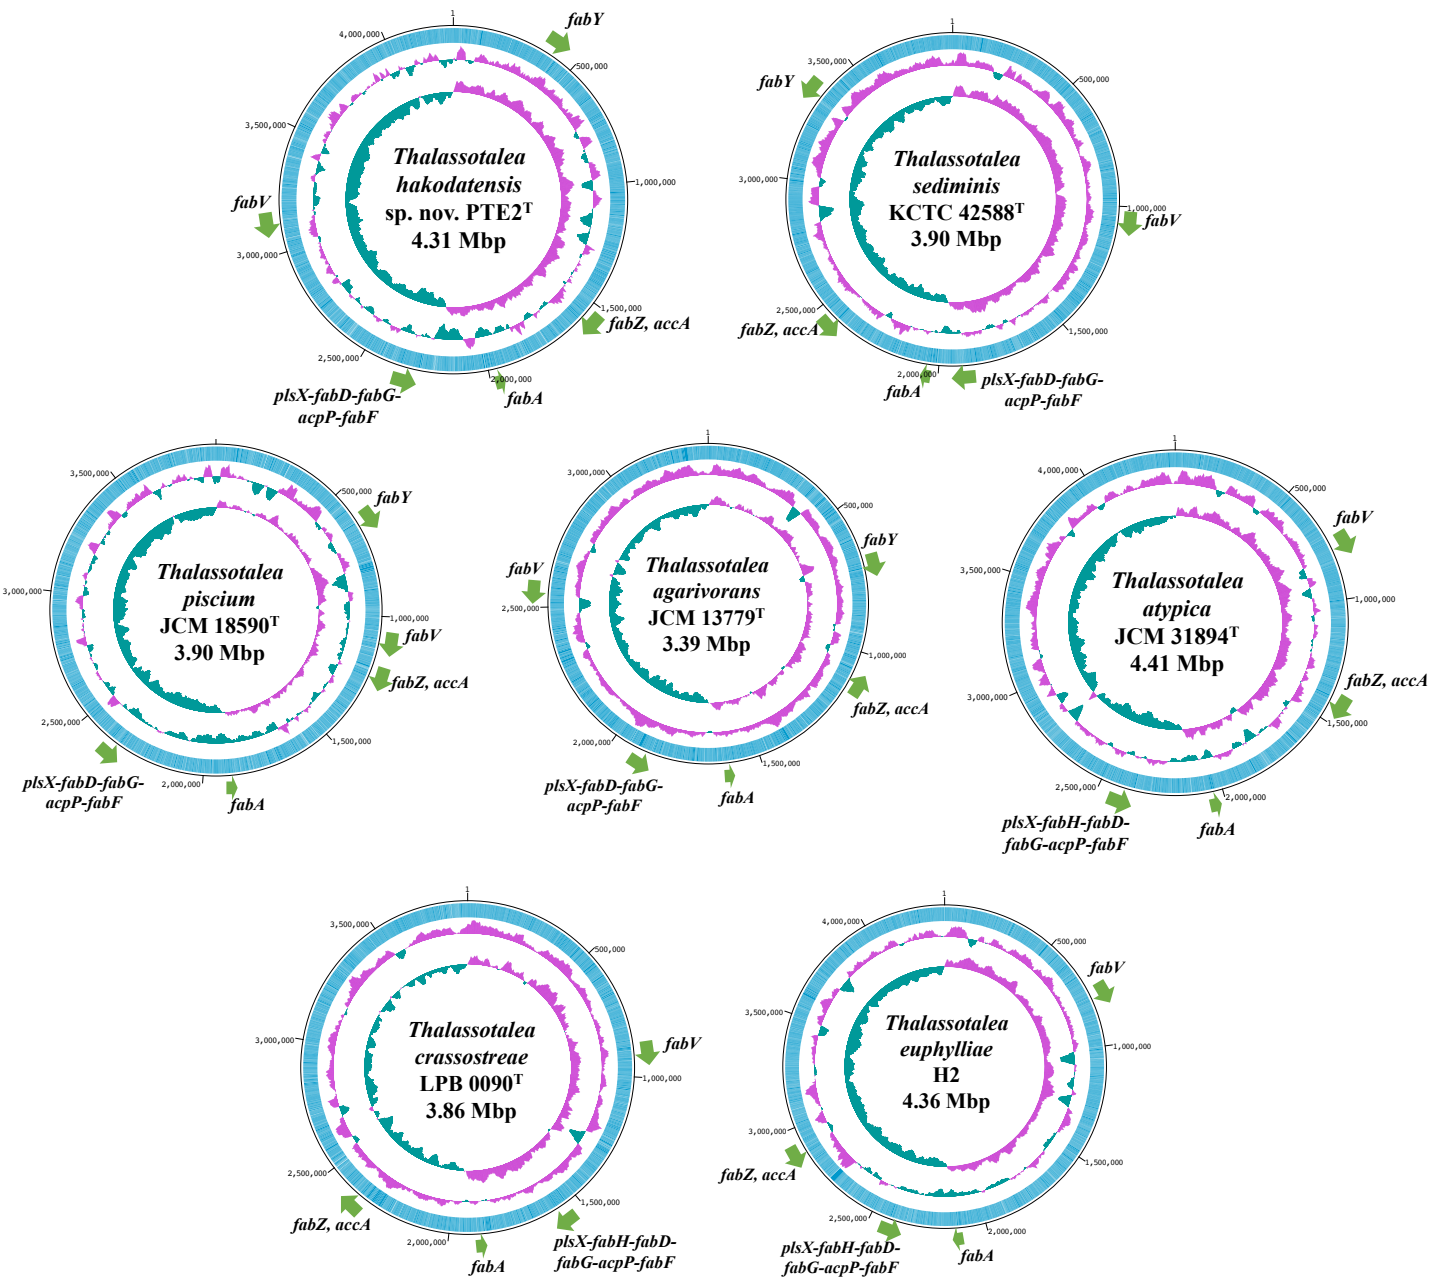

**Fig S3. Genomic distribution of *fab* and associated genes (only strains with complete genome sequence).**

Protein/enzyme name each gene is coding: *fabA*: 3-hydroxyacyl-ACP dehydrase/trans-2-decenoyl-ACP isomerase; *fabD*: malonyl-CoA: ACP transacylase; *fabF*: 3-ketoacyl-ACP synthase II; *fabG*: 3-ketoacyl-ACP reductase; *fabH*: 3-ketoacyl-ACP synthase III; *fabV*: enoyl-ACP reductase; *fabY*: 3-ketoacyl-ACP synthase; *fabZ*: 3-hydroxyacyl-ACP dehydratase; *accABCD*: carboxylase complex; *plsX*: phosphate acyltransferase; *acpP*: Acyl-carrier protein.
